# Supplementary material
Source: Elsevier journal article supplement (http://discovery.ucl.ac.uk/1426258/2/mmc1.docx)
Supplement: mmc1 [file mmc1.docx]

|  | **Schizophrenia Higher Cognition** | **Schizophrenia Lower Cognition** |
| --- | --- | --- |
| **Gender** | 7/16 | 14/12 |
| **Age** | 36.4 (11.5) | 38.0 (12.5) |
| **Parental SES (% in Social Class I-III)** | 53.8% | 62.5% |
| **Marital Status (% Married and Cohabiting)** | 73.9% | 34.6%** |
| **Employment Status (% Employed)** | 82.6% | 30.8%** |
| **NART IQ** | 113.3 (8.0) | 102 (24.1)* |
| **Quick Test IQ** | 98.3 (8.8) | 84.9 (13.8)* |
| **RBMT** | 21.5 (1.6) | 18.2 (3.8)** |
| **Verbal Fluency** | 35.3 (15.1) | 19.8 (7.1)** |
| **Digit Span Forward** | 6.8 (2.0) | 5.4 (1.9)** |
| **Digit Span Backward** | 5.7 (1.9) | 4.3 (1.4)** |
| **Number of years in education** | 10.8 (1.8) | 10.6 (2.5) |
| **Age of Onset** | 24.7 (7.0) | 24.7 (7.6) |
| **Duration of Illness** | 9.5 (7.1) | 11.0 (10.5) |
| **Number of admissions** | 3.3 (3.1) | 5.4 (5.2) |
| **PANSS positive** | 16.5 (6.1) | 19.5 (6.3) |
| **PANSS negative** | 15.5 (4.0) | 18.6 (5.9)* |
| **PANSS general** | 35.2 (6.7) | 37.5 (8.8) |
| * significant at p<0.05, ** significant at p<0.01 | | |

Supplementary table: Demographic and clinical characteristics of the schizophrenia cognition groups
